# Supplementary material for: Bonding and noncovalent interactions effects in 2,6-dimethylpiperazine-1,4-diium oxalate oxalic acid: DFT calculation, topological analysis, NMR and molecular docking studies
Source: publisher site journal article supplement (doi:10.1515/zpch-2023-0354), 2023-11-22
Supplement: Supplementary file 1 [file j_zpch-2023-0354_suppl_001.docx]

| **Table S1:** optimized structural parameters of the studied compound. | **Geometric parameters** | | | | |
| --- | --- | --- | --- | --- | --- |
| **Bond lengths (Å)** | |  | **Bond angles (°)** | | |
| **Theo.** | **Exp.** | **Theo.** | **Exp.** |
| **Gas** | **Gas** |
| C1-H2 | 1.104 | 1.000 | H2-C1-N3 | 109.5 | 108.6 |
| C1-N3 | 1.478 | 1.501(2) | H2-C1-C14 | 108.9 | 108.5 |
| C1-C14 | 1.527 | 1.513(2) | H2-C1-C17 | 109 | 108.5 |
| C1-C17 | 1.526 | 1.520(2) | N3-C1- C14 | 108.3 | 108.8(1) |
| N3-H4 | 2.005 | 0.92(2) | N3-C1-C17 | 110.8 | 110.4(1) |
| N3-H5 | 1.018 | 0.88(2) | C14-C1-C17 | 110.3 | 112.0(1) |
| N3-C6 | 1.476 | 1.501(2) | C1-N3-H4 | 119.6 | 110(1) |
| H4-O27 | 0.986 | 0.90(3) | C1-N3-H5 | 108.9 | 107(1) |
| C6-H7 | 1.104 | 1.000 | C1-N3-C6 | 111.2 | 113.5(1) |
| C6-C8 | 1.525 | 1.519(2) | H4-N3-H5 | 95.9 | 106(1) |
| C6-C21 | 1.527 | 1.516(2) | H4-N3-C6 | 110.8 | 113(1) |
| C8-H9 | 1.091 | 0.990 | H5-N3-C6 | 109.1 | 108(1) |
| C8-H10 | 1.090 | 0.990 | N3-H4-O27 | 160.2 | 114(2) |
| C8-N11 | 1.499 | 1.484(2) | N3-C6-H7 | 109.8 | 108.7(1) |
| N11-H12 | 1.019 | 0.91(2) | N3-C6-C8 | 107.5 | 110.0(1) |
| N11-H13 | 1.099 | 0.91(2) | C8-C6-C21 | 111.2 | 111.6(1) |
| N11-C14 | 1.503 | 1.494(2) | H7-C6-C8 | 108.5 | 109.6 |
| C14-H15 | 1.090 | 0.990 | H7-C6-C21 | 108.7 | 109.6 |
| C14-H16 | 1.091 | 0.989 | C21-C6-C21 | 111.1 | - |
| C17-H18 | 1.092 | 0.980 | C6-C8-H9 | 111.5 | - |
| C17-H19 | 1.093 | 0.980 | C6-C8-H10 | 110.5 | - |
| C17-H20 | 1.094 | 0.980 | C6-C8-N11 | 112.8 | - |
| C21-H22 | 1.093 | 0.980 | H9-C8-H10 | 107.9 | 108.1 |
| C21-H23 | 1.093 | 0.980 | H9-C8-N11 | 107.2 | 109.6 |
| C21-H24 | 1.092 | 0.980 | H10-C8-N11 | 106.9 | 109.6 |
| O25-C26 | 1.197 | 1.251(2) | C8-N11-H12 | 110.9 | - |
| C26-O27 | 1.347 | 1.248(2) | C8-N11-H13 | 106.5 | 107(1) |
| C26-C28 | 1.537 | 1.548(2) | C8-N11-C14 | 115.7 | 111.3(1) |
| C28-O29 | 1.317 | 1.264(2) | H12-N11-H13 | 106.8 | 109(1) |
| C28-O30 | 1.213 | 1.247(1) | H12-N11-C14 | 110.5 | 110(1) |
| O29-H34 | 1.012 | - | H13-N11-C14 | 105.9 | 109(1) |
| O31-C32 | 1.211 | 1.208(2) | C1-C14-N11 | 113.3 | 109.6(1) |
| C32-O33 | 1.291 | 1.304(2) | C1-C14-H15 | 110.2 | 109.8 |
| C32-C36 | 1.567 | 1.550(2) | C1-C14-H16 | 111.2 | 109.7 |
| O33-H34 | 1.657 | 0.96(2) | N11-C14-H15 | 106.9 | 109.8 |
| O35-C36 | 1.215 | 1.508(2) | N11-C14-H16 | 106.8 | 109.7 |
| C36-O37 | 1.333 | 1.304(2) | H15-C14-H16 | 108.3 | 109.8 |
| O37-H38 | 0.970 | 0.96(2) | C1-C17-H18 | 110.7 | 109.5 |
|  |  |  | C1-C17-H19 | 110.6 | 109.5 |
|  |  |  | C1-C17-H20 | 110.6 | 109.5 |
|  |  |  | H18-C17-H19 | 108.5 | 109.4 |
|  |  |  | H18-C17-H20 | 108.7 | 109.5 |
|  |  |  | H19-C17-H20 | 107.6 | 109.5 |
|  |  |  | C6-C21-H22 | 110.5 | 109.5 |
|  |  |  | C6-C21-H23 | 110.6 | 109.5 |
|  |  |  | C6-C21-H24 | 111.3 | 109.5 |
|  |  |  | H22-C21-H23 | 107.6 | 109.4 |
|  |  |  | H22-C21-H24 | 108.1 | 109.5 |
|  |  |  | H23-C21-H24 | 108.6 | 109.4 |
|  |  |  | O25-C26-O27 | 122.7 | 124.8(1) |
|  |  |  | O25-C26-C28 | 123.5 | 117.9(1) |
|  |  |  | O27-C26-O28 | 113.8 | 117.3(1) |
|  |  |  | H4-O27-C26 | 113.4 | 117.6(2) |
|  |  |  | C26-O28-O29 | 112.5 | 114.9(1) |
|  |  |  | C26-O28-O30 | 120.6 | - |
|  |  |  | O29-O28-O30 | 126.8 | - |
|  |  |  | O28-O29-H34 | 112.3 | - |
|  |  |  | O31-C32-O33 | 128.7 | 126.2(1) |
|  |  |  | O31-C32-C36 | 119.4 | 122.3(1) |
|  |  |  | O33-C32-C36 | 111.8 | 111.5(1) |
|  |  |  | C32-C33-H34 | 127.6 | 112.4(1) |
|  |  |  | C32-C36-O35 | 124.0 | 114.6(1) |
|  |  |  | C32-C36-O37 | 113.1 | 118.7(1) |
|  |  |  | O35-C36-O37 | 122.9 | 126.7(1) |
|  |  |  | C36-O37-H38 | 107.50 | 111(1) |

**Table S2:** IR frequencies, IIR and vibrational assignments of the title compound.

| **IR frequencies (cm‒1)** | | | **IIR** | **Assignments** |
| --- | --- | --- | --- | --- |
| **Unscaled** | **Scaled** | **Exp.** |
| 3748 | 3721 |  | 71.64 | νOH |
| 3502 | 3476 | 3437 | 50.67 | νNH |
| 3488 | 3463 | 7.94 | νNH |
| 3391 | 3366 |  | 7.14 | νOH |
| 3138 | 3115 | 2970 | 6.07 | νCH |
| 3130 | 3107 | 12.20 | νCH |
| 3114 | 3091 | 11.93 | νCH |
| 3113 | 3090 | 5.29 | νCH |
| 3099 | 3076 | 2700 | 8.39 | νCH |
| 3098 | 3075 | 2.27 | νCH |
| 3083 | 3061 | 12.59 | νCH |
| 3079 | 3057 | 2.78 | νCH |
| 3035 | 3013 | 2500 | 12.02 | νCH |
| 3034 | 3012 | 17.11 | νCH |
| 2983 | 2961 |  | 5.48 | νOH |
| 2930 | 2907 | 2700 | 27.91 | νCH |
| 2924 | 2903 | 2365 | νCH |
| 2233 | 2217 | 1738 | 213.89 | νNH |
| 1848 | 1835 | 1285.63 | νOC |
| 1773 | 1713 | 342.55 | νOC |
| 1764 | 1704 | 765.82 | νOC |
| 1757 | 1697 | 1607 | 319.62 | νOC |
| 1631 | 1575 | 13.10 | νOC |
| 1578 | 1524 | 518.74 | δHNH |
| 1518 | 1466 | 8.24 | τHNHO |
| 1509 | 1458 | 24.00 | δHCH |
| 1505 | 1454 | 5.41 | δHCH |
| 1501 | 1450 | 1464 | 9.29 | δHCH |
| 1501 | 1450 | 27.53 | δHCH |
| 1496 | 1445 | 11.28 | δHCH |
| 1471 | 1421 | 3.19 | δHCH |
| 1457 | 1407 | 10.54 | τHNHO |
| 1449 | 1400 | 55.18 | δHOC |
| 1442 | 1393 | 73.28 | νCC |
| 1425 | 1376 | 74.47 | δHCH |
| 1421 | 1373 | 120.70 | δHCH |
| 1413 | 1365 | 1310 | 201.28 | δHCC |
| 1378 | 1331 | 901.90 | δHOC |
| 1376 | 1329 | 181.86 | νOC |
| 1369 | 1322 | 21.82 | δHOC |
| 1361 | 1315 | 9.04 | τHNHO |
| 1355 | 1309 | 1.52 | δCNC |
| 1354 | 1308 | 22.03 | νOC |
| 1323 | 1278 | 12.03 | νOC |
| 1297 | 1253 | 1200 | 702.00 | δHCC |
| 1278 | 1234 | 69.58 | νCC |
| 1226 | 1184 | 10.82 | τHCCN |
| 1223 | 1182 | 109.45 | νOC |
| 1189 | 1149 | 1380 | 255.05 | νNC |
| 1182 | 1142 | 1465 | 14.06 | νOC |
| 1169 | 1129 | 1130 | 60.69 | νCC |
| 1168 | 1128 | 472.46 | νCC |
| 1130 | 1092 | 1260 | 459.12 | νNC |
| 1106 | 1068 | 162.57 | νNC |
| 1097 | 1060 |  | 3.49 | δOHO |
| 1052 | 1016 | 1050 | 71.61 | νCC |
| 1007 | 973 | 15.47 | νCC |
| 986. | 952 | 6.07 | νCC |
| 984 | 951 | 7.87 | νCC |
| 971 | 938 | 45.30 | νNC |
| 969 | 936 | 905 | 5.80 | νNC |
| 906 | 875 | 0.37 | νCC |
| 885 | 855 | 26.40 | νCC |
| 865 | 836 | 17.25 | γOCO |
| 850 | 821 | 7.03 | γOCO |
| 846 | 817 | 0.59 | γOCO |
| 844 | 815 | 93.37 | τHOCC |
| 842 | 813 | 6.36 | νCC |
| 836 | 805 | 23.53 | νNC |
| 821 | 793 | 15.24 | τHOCC |
| 807 | 780 | 34.36 | δCCO |
| 745 | 720 | 722 | 17.81 | δOCO |
| 700 | 676 | 67.17 | δOCO |
| 692 | 668 | 177.80 | δOCO |
| 663 | 640 | 90.93 | τHOCC |
| 600 | 580 | 35.92 | νNC |
| 554 | 535 | 590 | 88.91 | δCCO |
| 507 | 490 | 27.85 | νCC |
| 490.35 | 473 | 535 | 54.51 | τOHCCN |
| 454 | 439 | 7.37 | τHCCN |
| 448 | 433 | 148.32 | νCC |
| 444 | 429 | 11.51 | νNC |
| 433 | 418 | 1.43 | νNC |
| 421 | 407 |  | 1.79 | νCC |
| 357 | 345 |  | 7.71 | δCCC |
| 328 | 317 |  | 3.83 | νOH |
| 318 | 307 |  | 55.54 | δCCO |
| 294 | 284 |  | 1.95 | νOH |
| 267 | 258 |  | 1.63 | δCCO |
| 250 | 242 |  | 0.37 | δCCC |
| 247 | 239 |  | 0.11 | τHCCN |
| 233 | 225 |  | 0.92 | τHCCN |
| 207 | 200 |  | 31.66 | νOH |
| 200 | 1938 |  | 40.37 | τCNCC |
| 185 | 179 |  | 3.27 | νOH |
| 137 | 132 |  | 18.35 | νOH |
| 128 | 124 |  | 4.89 | νOH |
| 116 | 112 |  | 2.45 | δHOH |
| 103 | 100 |  | 1.88 | νOH |
| 99 | 96 |  | 1.14 | τHOCC |
| 90 | 87 |  | 0.66 | δHOC |
| 73 | 71 |  | 0.05 | δNHO |
| 71 | 69 |  | 8.69 | δNHO |
| 54 | 52 |  | 1.39 | δCOH |
| 48 | 46 |  | 4.14 | τOCCO |
| 40 | 39 |  | 2.19 | τHOCC |
| 31 | 30 |  | 3.53 | τCNHO |
| 13 | 13 |  | 1.52 | τCOHO |
